# Supplementary material for: Association between fatty acids and the risk of impaired glucose tolerance and type 2 diabetes mellitus in American adults: NHANES 2005−2016
Source: PubMed Central journal article supplement (PMC10151340; doi:10.1038/s41387-023-00236-4), 2023-05-01

# Scree plot

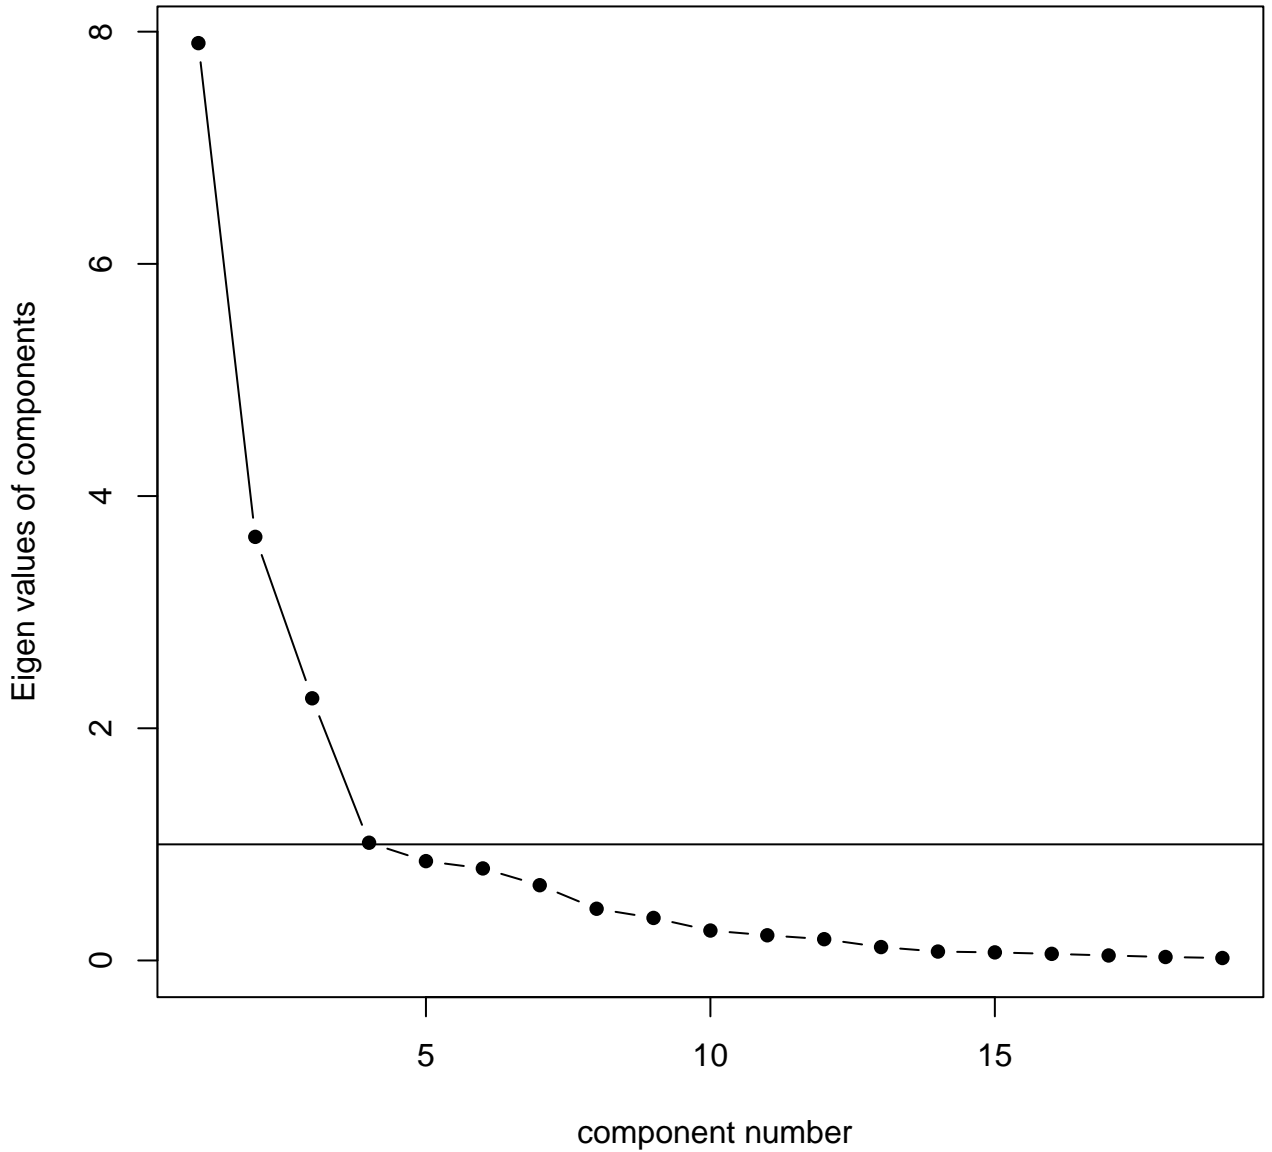

Supplement: 41387_2023_236_MOESM2_ESM.pdf [file 41387_2023_236_MOESM2_ESM.pdf]
